# Supplementary material
Source: MDPI journal article supplement (https://www.mdpi.com/2073-4441/14/7/1041)
Supplement: s1 [file s1]

**Table S1.** Weight and CVs of thematic maps by MCE techniques.

| Thematic layer | Map Rank | Map Weight  | Class Ranges                    | Degree    | Rank | Capability Value (CVs)        |
|----------------|----------|-------------|---------------------------------|-----------|------|-------------------------------|
| Geomorphology  | 5        | 5/20 = 0.25 | Coastal plains                  | Low       | 1    | 0.1                           |
|                |          |             | Basement ridge                  | Medium    | 2    | 0.2                           |
|                |          |             | Structural plateau              | High      | 3    | 0.3                           |
|                |          |             | Structural plains               | Very high | 4    | 0.4                           |
| Geology        | 4        | 4/20 = 0.20 | Chalky limestone                | Low       | 2    | Dissolve into five geological |
|                |          |             | Gabbroic rocks/older granite    | Very low  | 1    |                               |
|                |          |             | Nubian sandstone                | Very high | 5    |                               |
|                |          |             | Undifferentiated Quaternary     | Very high | 5    |                               |
|                |          |             | Hammamat clastics               | High      | 4    |                               |
|                |          |             | Dokhan volcanics                | Low       | 2    | (1) 0.067                     |
|                |          |             | Felsite                         | Low       | 2    | (2) 0.133                     |
|                |          |             | Metavolcanics                   | Medium    | 3    | (3) 0.2                       |
|                |          |             | Metavolcanics, undifferentiated | Medium    | 3    | (4) 0.267                     |
|                |          |             | Ophiolitic serpentinite         | Low       | 2    | (5) 0.333                     |
|                |          |             | Metagabbro to metadiorite       | Medium    | 3    |                               |
|                |          |             | Crystalline carbonate           | Low       | 2    |                               |
|                |          |             | Sandstone                       | Very high | 5    |                               |
|                |          |             | Sandstone and claystone         | Medium    | 3    |                               |
|                |          |             | Wadi deposits                   | High      | 4    |                               |
|                |          |             | Nile silt                       | Low       | 2    |                               |
| Lineaments     | 4        | 4/20 = 0.20 | 0-0.277                         | Very low  | 1    | 0.067                         |
|                |          |             | 0.278-0.462                     | Low       | 2    | 0.133                         |
|                |          |             | 0.463-0.627                     | Medium    | 3    | 0.2                           |
|                |          |             | 0.628-0.812                     | High      | 4    | 0.267                         |
|                |          |             | 0.813-1.31                      | Very high | 5    | 0.333                         |
| Slope          | 3        | 3/20 = 0.15 | 38.61-48.25                     | Very low  | 1    | 0.067                         |
|                |          |             | 28.96-38.6                      | Low       | 2    | 0.133                         |
|                |          |             | 19.31-28.95                     | Medium    | 3    | 0.2                           |
|                |          |             | 9.66-19.3                       | High      | 4    | 0.267                         |
|                |          |             | 0-9.65                          | Very high | 5    | 0.333                         |
| Drainage       | 2        | 2/20 = 0.10 | 361.01-651                      | Very low  | 1    | 0.067                         |
|                |          |             | 272.01-361                      | Low       | 2    | 0.133                         |
|                |          |             | 201.01-272                      | Medium    | 3    | 0.2                           |
|                |          |             | 134.01-201                      | High      | 4    | 0.267                         |
|                |          |             | 3-134                           | Very high | 5    | 0.333                         |
| Rainfall       | 2        | 2/20 = 0.10 | 0.83-1.84                       | Very low  | 1    | 0.067                         |
|                |          |             | 1.85-2.42                       | Low       | 2    | 0.133                         |
|                |          |             | 2.43-2.87                       | Medium    | 3    | 0.2                           |
|                |          |             | 2.88-3.45                       | High      | 4    | 0.267                         |
|                |          |             | 3.46-4.73                       | Very high | 5    | 0.333                         |

**Table S2.** Weights determined for geological, hydrogeological and hydrological parameters for AHP.

| Parameter            | Classes                         | Weight | Influences (%) | Rank | Area (km <sup>2</sup> )                         | Area (%) |
|----------------------|---------------------------------|--------|----------------|------|-------------------------------------------------|----------|
| <b>Geomorphology</b> | Coastal plains                  | 0.41   | 41             | 1    | 181.9                                           | 4.3      |
|                      | Basement ridge                  |        |                | 2    | 3078                                            | 72.9     |
|                      | Structural plateau              |        |                | 3    | 349.6                                           | 8.3      |
|                      | Structural plains               |        |                | 4    | 612.3                                           | 14.5     |
| <b>Geology</b>       | Chalky limestone                | 0.2    | 20             | 2    | Dissolve into five geological categories (1-5): |          |
|                      | Gabbroic rocks/older granite    |        |                | 1    |                                                 |          |
|                      | Nubian sandstone                |        |                | 5    |                                                 |          |
|                      | Undifferentiated Quaternary     |        |                | 5    |                                                 |          |
|                      | Hammamat clastics               |        |                | 4    |                                                 |          |
|                      | Dokhan volcanics                |        |                | 2    | (1) 528.8                                       | 13       |
|                      | Felsite                         |        |                | 2    | (2) 1142.7                                      | 28       |
|                      | metavolcanics                   |        |                | 3    | (3) 986.8                                       | 24.2     |
|                      | Metavolcanics, undifferentiated |        |                | 3    | (4) 311.7                                       | 7.6      |
|                      | Ophiolitic serpentinite         |        |                | 2    | (5) 1108.5                                      | 27.2     |
|                      | Metagabbro to metadiorite       |        |                | 3    |                                                 |          |
|                      | Crystalline carbonate           |        |                | 2    |                                                 |          |
|                      | Sandstone                       |        |                | 5    |                                                 |          |
|                      | Sandstone and claystone         |        |                | 3    |                                                 |          |
|                      | Wadi deposits                   |        |                | 4    |                                                 |          |
|                      | Nile silt                       |        |                | 2    |                                                 |          |
| <b>Lineaments</b>    | 0-0.277                         | 0.14   | 14             | 1    | 559                                             | 13.7     |
|                      | 0.278-0.462                     |        |                | 2    | 1023.2                                          | 25.1     |
|                      | 0.463-0.627                     |        |                | 3    | 1190.7                                          | 29.2     |
|                      | 0.628-0.812                     |        |                | 4    | 914.5                                           | 22.4     |
|                      | 0.813-1.31                      |        |                | 5    | 386.9                                           | 9.5      |
| <b>Slope</b>         | 38.61-48.25                     | 0.1    | 10             | 1    | 0.9                                             | 0        |
|                      | 28.96-38.6                      |        |                | 2    | 23.7                                            | 0.6      |
|                      | 19.31-28.95                     |        |                | 3    | 166                                             | 3.9      |
|                      | 9.66-19.3                       |        |                | 4    | 745                                             | 17.5     |
|                      | 0-9.65                          |        |                | 5    | 3322.9                                          | 78       |
| <b>Drainage</b>      | 361.01-651                      | 0.082  | 8.2            | 1    | 248.9                                           | 5.9      |
|                      | 272.01-361                      |        |                | 2    | 697.3                                           | 16.4     |
|                      | 201.01-272                      |        |                | 3    | 1084.6                                          | 25.6     |
|                      | 134.01-201                      |        |                | 4    | 1208.1                                          | 28.5     |
|                      | 3-134                           |        |                | 5    | 1003.7                                          | 23.7     |
| <b>Rainfall</b>      | 0.83-1.84                       | 0.068  | 6.8            | 1    | 403.5                                           | 9.5      |
|                      | 1.85-2.42                       |        |                | 2    | 818.5                                           | 19.3     |
|                      | 2.43-2.87                       |        |                | 3    | 1272.8                                          | 30       |
|                      | 2.88-3.45                       |        |                | 4    | 1392.5                                          | 32.8     |
|                      | 3.46-4.73                       |        |                | 5    | 354.1                                           | 8.3      |
